# Supplementary material
Source: PubMed Central journal article supplement (PMC3219057)
Supplement: NIHMS329850-supplement-3_si_003.pdf [file NIHMS329850-supplement-3_si_003.pdf]

# **Diastereocontrol in Asymmetric Allyl-Allyl Cross Coupling: Stereocontrolled Reaction of Prochiral Allylboronates with Prochiral Allyl Chlorides**

Laura A. Brozek, Michael J. Ardolino, James P. Morken\*

*Department of Chemistry, Merkert Chemistry Center, Boston College, Chestnut Hill, MA 02467*

Table 1. Crystal data and structure refinement for C<sub>30</sub>H<sub>24</sub>Cl<sub>2</sub>O<sub>6</sub>P<sub>2</sub>Pd.

|                                        |                                                                                  |                       |
|----------------------------------------|----------------------------------------------------------------------------------|-----------------------|
| Identification code                    | C <sub>30</sub> H <sub>24</sub> Cl <sub>2</sub> O <sub>6</sub> P <sub>2</sub> Pd |                       |
| Empirical formula                      | C <sub>30</sub> H <sub>24</sub> Cl <sub>2</sub> O <sub>6</sub> P <sub>2</sub> Pd |                       |
| Formula weight                         | 719.73                                                                           |                       |
| Temperature                            | 100(2) K                                                                         |                       |
| Wavelength                             | 0.71073 $\approx$                                                                |                       |
| Crystal system                         | Tetragonal                                                                       |                       |
| Space group                            | P4(1)2(1)2                                                                       |                       |
| Unit cell dimensions                   | a = 11.0719(3) $\approx$                                                         | $\alpha = 90^\circ$ . |
|                                        | b = 11.0719(3) $\approx$                                                         | $\beta = 90^\circ$ .  |
|                                        | c = 23.9032(7) $\approx$                                                         | $\gamma = 90^\circ$ . |
| Volume                                 | 2930.22(14) $\approx^3$                                                          |                       |
| Z                                      | 4                                                                                |                       |
| Density (calculated)                   | 1.631 Mg/m <sup>3</sup>                                                          |                       |
| Absorption coefficient                 | 0.968 mm <sup>-1</sup>                                                           |                       |
| F(000)                                 | 1448                                                                             |                       |
| Crystal size                           | 0.16 x 0.15 x 0.12 mm <sup>3</sup>                                               |                       |
| Theta range for data collection        | 2.03 to 28.35 $^\circ$ .                                                         |                       |
| Index ranges                           | -14 $\leq$ h $\leq$ 14, -13 $\leq$ k $\leq$ 14, -29 $\leq$ l $\leq$ 31           |                       |
| Reflections collected                  | 25662                                                                            |                       |
| Independent reflections                | 3655 [R(int) = 0.0196]                                                           |                       |
| Completeness to theta = 28.35 $^\circ$ | 100.0 %                                                                          |                       |
| Absorption correction                  | Semi-empirical from equivalents                                                  |                       |
| Max. and min. transmission             | 0.8927 and 0.8605                                                                |                       |
| Refinement method                      | Full-matrix least-squares on F <sup>2</sup>                                      |                       |
| Data / restraints / parameters         | 3655 / 0 / 187                                                                   |                       |
| Goodness-of-fit on F <sup>2</sup>      | 1.119                                                                            |                       |
| Final R indices [I > 2 $\sigma$ (I)]   | R1 = 0.0145, wR2 = 0.0376                                                        |                       |
| R indices (all data)                   | R1 = 0.0149, wR2 = 0.0378                                                        |                       |
| Absolute structure parameter           | -0.006(14)                                                                       |                       |
| Extinction coefficient                 | na                                                                               |                       |
| Largest diff. peak and hole            | 0.273 and -0.348 e. $\approx$ <sup>-3</sup>                                      |                       |

Table 2. Atomic coordinates ( $\times 10^4$ ) and equivalent isotropic displacement parameters ( $\approx 2 \times 10^3$ ) for C<sub>30</sub>H<sub>24</sub>Cl<sub>2</sub>O<sub>6</sub>P<sub>2</sub>Pd. U(eq) is defined as one third of the trace of the orthogonalized U<sup>ij</sup> tensor.

|       | x        | y        | z       | U(eq) |
|-------|----------|----------|---------|-------|
| Pd(1) | 10183(1) | 10183(1) | 0       | 11(1) |
| Cl(1) | 12198(1) | 10220(1) | 294(1)  | 23(1) |
| P(1)  | 9929(1)  | 8442(1)  | 456(1)  | 11(1) |
| O(1)  | 10132(1) | 6020(1)  | 337(1)  | 20(1) |
| O(2)  | 5465(1)  | 7352(1)  | 95(1)   | 17(1) |
| O(3)  | 10814(1) | 9358(1)  | 1432(1) | 20(1) |
| C(1)  | 10401(1) | 7121(1)  | 100(1)  | 14(1) |
| C(2)  | 11033(1) | 6971(2)  | -380(1) | 22(1) |
| C(3)  | 11169(2) | 5702(2)  | -450(1) | 31(1) |
| C(4)  | 10617(1) | 5175(2)  | -12(1)  | 28(1) |
| C(5)  | 8368(1)  | 8233(1)  | 672(1)  | 12(1) |
| C(6)  | 7487(1)  | 7820(1)  | 294(1)  | 12(1) |
| C(7)  | 6282(1)  | 7770(1)  | 474(1)  | 14(1) |
| C(8)  | 5959(1)  | 8172(2)  | 1006(1) | 19(1) |
| C(9)  | 6838(1)  | 8618(2)  | 1363(1) | 22(1) |
| C(10) | 8039(1)  | 8646(1)  | 1205(1) | 17(1) |
| C(11) | 4248(1)  | 7225(2)  | 285(1)  | 22(1) |
| C(12) | 10834(1) | 8382(1)  | 1078(1) | 14(1) |
| C(13) | 11701(2) | 9144(2)  | 1820(1) | 24(1) |
| C(14) | 12257(1) | 8087(1)  | 1724(1) | 22(1) |
| C(15) | 11696(1) | 7582(1)  | 1239(1) | 17(1) |

Table 3. Bond lengths [ $\approx$ ] and angles [ $\infty$ ] for C<sub>30</sub>H<sub>24</sub>Cl<sub>2</sub>O<sub>6</sub>P<sub>2</sub>Pd.

---

|               |            |
|---------------|------------|
| Pd(1)-P(1)    | 2.2332(3)  |
| Pd(1)-P(1)#1  | 2.2332(3)  |
| Pd(1)-Cl(1)#1 | 2.3389(3)  |
| Pd(1)-Cl(1)   | 2.3389(3)  |
| P(1)-C(1)     | 1.7711(14) |
| P(1)-C(12)    | 1.7931(14) |
| P(1)-C(5)     | 1.8180(13) |
| O(1)-C(4)     | 1.3640(19) |
| O(1)-C(1)     | 1.3767(16) |
| O(2)-C(7)     | 1.3605(17) |
| O(2)-C(11)    | 1.4290(17) |
| O(3)-C(13)    | 1.3724(18) |
| O(3)-C(12)    | 1.3726(17) |
| C(1)-C(2)     | 1.3551(19) |
| C(2)-C(3)     | 1.423(2)   |
| C(2)-H(2)     | 0.9500     |
| C(3)-C(4)     | 1.344(3)   |
| C(3)-H(3)     | 0.9500     |
| C(4)-H(4)     | 0.9500     |
| C(5)-C(10)    | 1.4020(18) |
| C(5)-C(6)     | 1.4069(17) |
| C(6)-C(7)     | 1.4021(19) |
| C(6)-C(6)#1   | 1.500(2)   |
| C(7)-C(8)     | 1.3955(19) |
| C(8)-C(9)     | 1.386(2)   |
| C(8)-H(8)     | 0.9500     |
| C(9)-C(10)    | 1.383(2)   |
| C(9)-H(9)     | 0.9500     |
| C(10)-H(10)   | 0.9500     |
| C(11)-H(11A)  | 0.9800     |
| C(11)-H(11B)  | 0.9800     |
| C(11)-H(11C)  | 0.9800     |
| C(12)-C(15)   | 1.358(2)   |
| C(13)-C(14)   | 1.342(2)   |

|                      |             |
|----------------------|-------------|
| C(13)-H(13)          | 0.9500      |
| C(14)-C(15)          | 1.429(2)    |
| C(14)-H(14)          | 0.9500      |
| C(15)-H(15)          | 0.9500      |
| P(1)-Pd(1)-P(1)#1    | 91.193(18)  |
| P(1)-Pd(1)-Cl(1)#1   | 166.502(13) |
| P(1)#1-Pd(1)-Cl(1)#1 | 89.329(12)  |
| P(1)-Pd(1)-Cl(1)     | 89.329(12)  |
| P(1)#1-Pd(1)-Cl(1)   | 166.501(13) |
| Cl(1)#1-Pd(1)-Cl(1)  | 93.297(19)  |
| C(1)-P(1)-C(12)      | 101.71(7)   |
| C(1)-P(1)-C(5)       | 108.19(6)   |
| C(12)-P(1)-C(5)      | 106.92(6)   |
| C(1)-P(1)-Pd(1)      | 116.15(5)   |
| C(12)-P(1)-Pd(1)     | 111.48(5)   |
| C(5)-P(1)-Pd(1)      | 111.61(4)   |
| C(4)-O(1)-C(1)       | 105.68(12)  |
| C(7)-O(2)-C(11)      | 116.67(11)  |
| C(13)-O(3)-C(12)     | 105.66(11)  |
| C(2)-C(1)-O(1)       | 110.62(12)  |
| C(2)-C(1)-P(1)       | 131.39(12)  |
| O(1)-C(1)-P(1)       | 117.97(9)   |
| C(1)-C(2)-C(3)       | 105.88(15)  |
| C(1)-C(2)-H(2)       | 127.1       |
| C(3)-C(2)-H(2)       | 127.1       |
| C(4)-C(3)-C(2)       | 106.88(15)  |
| C(4)-C(3)-H(3)       | 126.6       |
| C(2)-C(3)-H(3)       | 126.6       |
| C(3)-C(4)-O(1)       | 110.94(14)  |
| C(3)-C(4)-H(4)       | 124.5       |
| O(1)-C(4)-H(4)       | 124.5       |
| C(10)-C(5)-C(6)      | 120.62(12)  |
| C(10)-C(5)-P(1)      | 117.64(10)  |
| C(6)-C(5)-P(1)       | 121.22(10)  |
| C(7)-C(6)-C(5)       | 118.44(12)  |

|                     |            |
|---------------------|------------|
| C(7)-C(6)-C(6)#1    | 120.74(11) |
| C(5)-C(6)-C(6)#1    | 120.78(10) |
| O(2)-C(7)-C(8)      | 123.04(13) |
| O(2)-C(7)-C(6)      | 116.22(12) |
| C(8)-C(7)-C(6)      | 120.71(13) |
| C(9)-C(8)-C(7)      | 119.71(14) |
| C(9)-C(8)-H(8)      | 120.1      |
| C(7)-C(8)-H(8)      | 120.1      |
| C(10)-C(9)-C(8)     | 120.99(14) |
| C(10)-C(9)-H(9)     | 119.5      |
| C(8)-C(9)-H(9)      | 119.5      |
| C(9)-C(10)-C(5)     | 119.44(13) |
| C(9)-C(10)-H(10)    | 120.3      |
| C(5)-C(10)-H(10)    | 120.3      |
| O(2)-C(11)-H(11A)   | 109.5      |
| O(2)-C(11)-H(11B)   | 109.5      |
| H(11A)-C(11)-H(11B) | 109.5      |
| O(2)-C(11)-H(11C)   | 109.5      |
| H(11A)-C(11)-H(11C) | 109.5      |
| H(11B)-C(11)-H(11C) | 109.5      |
| C(15)-C(12)-O(3)    | 110.46(12) |
| C(15)-C(12)-P(1)    | 130.70(11) |
| O(3)-C(12)-P(1)     | 118.21(10) |
| C(14)-C(13)-O(3)    | 111.27(13) |
| C(14)-C(13)-H(13)   | 124.4      |
| O(3)-C(13)-H(13)    | 124.4      |
| C(13)-C(14)-C(15)   | 106.32(13) |
| C(13)-C(14)-H(14)   | 126.8      |
| C(15)-C(14)-H(14)   | 126.8      |
| C(12)-C(15)-C(14)   | 106.29(13) |
| C(12)-C(15)-H(15)   | 126.9      |
| C(14)-C(15)-H(15)   | 126.9      |

---

Symmetry transformations used to generate equivalent atoms:

#1 y,x,-z

Table 4. Anisotropic displacement parameters ( $\approx 2 \times 10^3$ ) for C<sub>30</sub>H<sub>24</sub>Cl<sub>2</sub>O<sub>6</sub>P<sub>2</sub>Pd. The anisotropic displacement factor exponent takes the form:  $-2\pi^2 [ h^2 a^{*2}U^{11} + \dots + 2 h k a^* b^* U^{12} ]$

|       | U <sup>11</sup> | U <sup>22</sup> | U <sup>33</sup> | U <sup>23</sup> | U <sup>13</sup> | U <sup>12</sup> |
|-------|-----------------|-----------------|-----------------|-----------------|-----------------|-----------------|
| Pd(1) | 10(1)           | 10(1)           | 14(1)           | 1(1)            | -1(1)           | -2(1)           |
| Cl(1) | 12(1)           | 23(1)           | 33(1)           | 9(1)            | -5(1)           | -6(1)           |
| P(1)  | 10(1)           | 11(1)           | 12(1)           | 0(1)            | 1(1)            | -1(1)           |
| O(1)  | 22(1)           | 12(1)           | 27(1)           | 1(1)            | -3(1)           | -1(1)           |
| O(2)  | 11(1)           | 23(1)           | 18(1)           | -1(1)           | 0(1)            | -5(1)           |
| O(3)  | 22(1)           | 19(1)           | 18(1)           | -4(1)           | -7(1)           | 2(1)            |
| C(1)  | 13(1)           | 12(1)           | 19(1)           | -1(1)           | 0(1)            | 0(1)            |
| C(2)  | 17(1)           | 27(1)           | 22(1)           | -5(1)           | 4(1)            | 2(1)            |
| C(3)  | 23(1)           | 32(1)           | 38(1)           | -18(1)          | -1(1)           | 11(1)           |
| C(4)  | 28(1)           | 15(1)           | 43(1)           | -9(1)           | -11(1)          | 6(1)            |
| C(5)  | 11(1)           | 12(1)           | 13(1)           | 1(1)            | 1(1)            | 0(1)            |
| C(6)  | 14(1)           | 10(1)           | 13(1)           | 0(1)            | 1(1)            | -1(1)           |
| C(7)  | 14(1)           | 14(1)           | 16(1)           | 1(1)            | 0(1)            | -2(1)           |
| C(8)  | 13(1)           | 26(1)           | 17(1)           | 0(1)            | 4(1)            | 0(1)            |
| C(9)  | 19(1)           | 31(1)           | 14(1)           | -4(1)           | 3(1)            | 1(1)            |
| C(10) | 16(1)           | 22(1)           | 13(1)           | -1(1)           | 0(1)            | -1(1)           |
| C(11) | 13(1)           | 30(1)           | 23(1)           | 4(1)            | 0(1)            | -6(1)           |
| C(12) | 14(1)           | 15(1)           | 13(1)           | 0(1)            | -1(1)           | -2(1)           |
| C(13) | 26(1)           | 28(1)           | 18(1)           | -2(1)           | -10(1)          | -2(1)           |
| C(14) | 19(1)           | 26(1)           | 20(1)           | 5(1)            | -7(1)           | -2(1)           |
| C(15) | 15(1)           | 18(1)           | 19(1)           | 3(1)            | 0(1)            | -2(1)           |

Table 5. Hydrogen coordinates ( $\times 10^4$ ) and isotropic displacement parameters ( $\approx 2 \times 10^{-3}$ ) for C<sub>30</sub>H<sub>24</sub>Cl<sub>2</sub>O<sub>6</sub>P<sub>2</sub>Pd.

|        | x     | y    | z    | U(eq) |
|--------|-------|------|------|-------|
| H(2)   | 11326 | 7587 | -622 | 26    |
| H(3)   | 11573 | 5303 | -748 | 37    |
| H(4)   | 10569 | 4327 | 45   | 34    |
| H(8)   | 5140  | 8140 | 1124 | 22    |
| H(9)   | 6612  | 8909 | 1722 | 26    |
| H(10)  | 8636  | 8942 | 1456 | 20    |
| H(11A) | 4235  | 6736 | 626  | 33    |
| H(11B) | 3766  | 6827 | -5   | 33    |
| H(11C) | 3909  | 8025 | 363  | 33    |
| H(13)  | 11895 | 9675 | 2119 | 29    |
| H(14)  | 12896 | 7743 | 1936 | 26    |
| H(15)  | 11889 | 6835 | 1064 | 21    |



Table 6. Torsion angles [ $^{\circ}$ ] for C<sub>30</sub>H<sub>24</sub>Cl<sub>2</sub>O<sub>6</sub>P<sub>2</sub>Pd.

---

|                          |             |
|--------------------------|-------------|
| P(1)#1-Pd(1)-P(1)-C(1)   | 84.04(5)    |
| Cl(1)#1-Pd(1)-P(1)-C(1)  | 176.14(7)   |
| Cl(1)-Pd(1)-P(1)-C(1)    | -82.46(5)   |
| P(1)#1-Pd(1)-P(1)-C(12)  | -160.10(5)  |
| Cl(1)#1-Pd(1)-P(1)-C(12) | -68.00(8)   |
| Cl(1)-Pd(1)-P(1)-C(12)   | 33.39(5)    |
| P(1)#1-Pd(1)-P(1)-C(5)   | -40.61(4)   |
| Cl(1)#1-Pd(1)-P(1)-C(5)  | 51.48(8)    |
| Cl(1)-Pd(1)-P(1)-C(5)    | 152.88(5)   |
| C(4)-O(1)-C(1)-C(2)      | -0.11(16)   |
| C(4)-O(1)-C(1)-P(1)      | -178.70(10) |
| C(12)-P(1)-C(1)-C(2)     | -111.98(15) |
| C(5)-P(1)-C(1)-C(2)      | 135.63(15)  |
| Pd(1)-P(1)-C(1)-C(2)     | 9.24(17)    |
| C(12)-P(1)-C(1)-O(1)     | 66.26(11)   |
| C(5)-P(1)-C(1)-O(1)      | -46.13(12)  |
| Pd(1)-P(1)-C(1)-O(1)     | -172.52(8)  |
| O(1)-C(1)-C(2)-C(3)      | 0.03(18)    |
| P(1)-C(1)-C(2)-C(3)      | 178.37(12)  |
| C(1)-C(2)-C(3)-C(4)      | 0.06(19)    |
| C(2)-C(3)-C(4)-O(1)      | -0.13(19)   |
| C(1)-O(1)-C(4)-C(3)      | 0.15(17)    |
| C(1)-P(1)-C(5)-C(10)     | 139.33(11)  |
| C(12)-P(1)-C(5)-C(10)    | 30.46(13)   |
| Pd(1)-P(1)-C(5)-C(10)    | -91.68(11)  |
| C(1)-P(1)-C(5)-C(6)      | -48.88(12)  |
| C(12)-P(1)-C(5)-C(6)     | -157.74(11) |
| Pd(1)-P(1)-C(5)-C(6)     | 80.11(11)   |
| C(10)-C(5)-C(6)-C(7)     | -3.4(2)     |
| P(1)-C(5)-C(6)-C(7)      | -174.91(10) |
| C(10)-C(5)-C(6)-C(6)#1   | 174.24(14)  |
| P(1)-C(5)-C(6)-C(6)#1    | 2.69(19)    |
| C(11)-O(2)-C(7)-C(8)     | -6.1(2)     |
| C(11)-O(2)-C(7)-C(6)     | 176.09(13)  |

|                         |             |
|-------------------------|-------------|
| C(5)-C(6)-C(7)-O(2)     | -179.31(12) |
| C(6)#1-C(6)-C(7)-O(2)   | 3.1(2)      |
| C(5)-C(6)-C(7)-C(8)     | 2.8(2)      |
| C(6)#1-C(6)-C(7)-C(8)   | -174.80(14) |
| O(2)-C(7)-C(8)-C(9)     | -178.15(14) |
| C(6)-C(7)-C(8)-C(9)     | -0.4(2)     |
| C(7)-C(8)-C(9)-C(10)    | -1.5(2)     |
| C(8)-C(9)-C(10)-C(5)    | 1.0(2)      |
| C(6)-C(5)-C(10)-C(9)    | 1.5(2)      |
| P(1)-C(5)-C(10)-C(9)    | 173.38(12)  |
| C(13)-O(3)-C(12)-C(15)  | 0.19(16)    |
| C(13)-O(3)-C(12)-P(1)   | -171.65(10) |
| C(1)-P(1)-C(12)-C(15)   | 2.38(16)    |
| C(5)-P(1)-C(12)-C(15)   | 115.73(14)  |
| Pd(1)-P(1)-C(12)-C(15)  | -122.03(14) |
| C(1)-P(1)-C(12)-O(3)    | 172.27(11)  |
| C(5)-P(1)-C(12)-O(3)    | -74.38(12)  |
| Pd(1)-P(1)-C(12)-O(3)   | 47.85(11)   |
| C(12)-O(3)-C(13)-C(14)  | -0.19(18)   |
| O(3)-C(13)-C(14)-C(15)  | 0.13(19)    |
| O(3)-C(12)-C(15)-C(14)  | -0.11(16)   |
| P(1)-C(12)-C(15)-C(14)  | 170.38(12)  |
| C(13)-C(14)-C(15)-C(12) | -0.01(17)   |

---

Symmetry transformations used to generate equivalent atoms:

#1 y,x,-z
